# Supplementary material for: Is there an omission effect in prosocial behavior? A laboratory experiment on passive vs. active generosity
Source: PLOS journal article supplement (doi:10.1371/journal.pone.0172496), 2017-03-01
Supplement: S4 (10.1371/journal.pone.0172496.s004) [file journal.pone.0172496.s004]

# SUPPORTING INFORMATION S1

## Additional tables

**Table A** All allocation choices.

| Choice nr. | $\pi_i$ | $\pi_j$ | $\hat{\pi}_i$ | $\hat{\pi}_j$ | $\frac{\hat{\pi}_j - \pi_j}{(\pi_i - \hat{\pi}_i)}$ | $\pi_i - \pi_j$ | $\hat{\pi}_i - \hat{\pi}_j$ |
|------------|---------|---------|---------------|---------------|-----------------------------------------------------|-----------------|-----------------------------|
| 1          | 90      | 10      | 70            | 70            | 3                                                   | 80              | 0                           |
| 2          | 75      | 75      | 90            | 60            | 1                                                   | 0               | 30                          |
| 3          | 140     | 10      | 75            | 75            | 1                                                   | 130             | 0                           |
| 4          | 125     | 25      | 150           | 0             | 1                                                   | 100             | 150                         |
| 5          | 150     | 0       | 90            | 60            | 1                                                   | 150             | 30                          |
| 6          | 125     | 40      | 135           | 0             | 4                                                   | 85              | 135                         |
| 7          | 110     | 40      | 70            | 80            | 1                                                   | 70              | -10                         |
| 8          | 70      | 80      | 140           | 10            | 1                                                   | -10             | 130                         |
| 9          | 100     | 25      | 75            | 100           | 3                                                   | 75              | -25                         |
| 10         | 90      | 90      | 110           | 10            | 4                                                   | 0               | 100                         |
| 11         | 40      | 80      | 60            | 60            | 1                                                   | -40             | 0                           |
| 12         | 50      | 50      | 30            | 110           | 3                                                   | 0               | -80                         |
| 13         | 50      | 100     | 50            | 50            | -                                                   | -50             | 0                           |
| 14         | 25      | 125     | 0             | 0             | -5                                                  | -100            | 0                           |

*Note:*  $\pi_i$  denotes payoff to the dictator and  $\pi_j$  denotes payoff to the recipient. Each allocation involves a tradeoff between the two payoff vectors  $(\pi_i, \pi_j)$  and  $(\hat{\pi}_i, \hat{\pi}_j)$ . The ratio  $(\hat{\pi}_j - \pi_j)/(\pi_i - \hat{\pi}_i)$  indicates the “relative price” of giving, i.e. the amount of DKK the recipient gains (loses) for every DKK the dictator loses (gains).  $\pi_i - \pi_j$  and  $\hat{\pi}_i - \hat{\pi}_j$  indicates the inequality of payoffs between the dictator and the recipient in the two payoff vectors (a positive number indicates that the dictator is ahead and a negative number indicates that the dictator is behind). All subjects face choice 1 as their first choice. The order of choices 2-14 is randomized.

**Table B** Participant characteristics.

|                              | All               | Commission<br>treatment | Omission<br>treatment | Difference | <i>p</i> -value |
|------------------------------|-------------------|-------------------------|-----------------------|------------|-----------------|
| Age                          | 25.595<br>(4.253) | 25.320<br>(4.025)       | 25.870<br>(4.463)     | -0.550     | 0.196           |
| Female                       | 0.480<br>(0.500)  | 0.465<br>(0.500)        | 0.495<br>(0.501)      | -0.030     | 0.550           |
| Danish                       | 0.258<br>(0.438)  | 0.240<br>(0.428)        | 0.276<br>(0.448)      | -0.036     | 0.419           |
| Full time student            | 0.778<br>(0.416)  | 0.758<br>(0.430)        | 0.798<br>(0.403)      | -0.040     | 0.334           |
| Economics course(s)<br>taken | 0.610<br>(0.488)  | 0.635<br>(0.483)        | 0.585<br>(0.494)      | 0.050      | 0.305           |

*Note:* Standard deviations in parentheses.  $N=400$ . All variables except for *Age* are binary. The *p*-value for the age difference across treatments is obtained using a two-sided, two-sample t-test. All other *p*-values are obtained using chi-squared tests.

**Table C** Treatment effects in all 14 allocation choices

|        |         |         |               |               | Share of default choices   |          |                       |         |                                        |          |                       |         |
|--------|---------|---------|---------------|---------------|----------------------------|----------|-----------------------|---------|----------------------------------------|----------|-----------------------|---------|
|        |         |         |               |               | Default ( $\pi_i, \pi_j$ ) |          |                       |         | Default ( $\hat{\pi}_i, \hat{\pi}_j$ ) |          |                       |         |
| Choice |         |         |               |               | Commission                 | Omission | Omission – Commission |         | Commission                             | Omission | Omission – Commission |         |
| no.    | $\pi_i$ | $\pi_j$ | $\hat{\pi}_i$ | $\hat{\pi}_j$ |                            |          | Effect size           | $p$     |                                        |          | Effect size           | $p$     |
| 1      | 90      | 10      | 70            | 70            | 0.438                      | 0.467    | 0.028                 | (0.691) | 0.638                                  | 0.526    | -0.112                | (0.109) |
| 2      | 75      | 75      | 90            | 60            | 0.390                      | 0.330    | -0.060                | (0.380) | 0.653                                  | 0.670    | 0.017                 | (0.797) |
| 3      | 140     | 10      | 75            | 75            | 0.684                      | 0.648    | -0.035                | (0.607) | 0.449                                  | 0.339    | -0.110                | (0.107) |
| 4      | 125     | 25      | 150           | 0             | 0.535                      | 0.467    | -0.068                | (0.334) | 0.543                                  | 0.583    | 0.040                 | (0.582) |
| 5      | 150     | 0       | 90            | 60            | 0.538                      | 0.656    | 0.119                 | (0.096) | 0.442                                  | 0.404    | -0.038                | (0.575) |
| 6      | 125     | 40      | 135           | 0             | 0.651                      | 0.558    | -0.093                | (0.198) | 0.333                                  | 0.448    | 0.115                 | (0.091) |
| 7      | 110     | 40      | 70            | 80            | 0.769                      | 0.768    | -0.002                | (0.979) | 0.222                                  | 0.257    | 0.035                 | (0.570) |
| 8      | 70      | 80      | 140           | 10            | 0.378                      | 0.258    | -0.120                | (0.082) | 0.733                                  | 0.692    | -0.042                | (0.502) |
| 9      | 100     | 25      | 75            | 100           | 0.618                      | 0.690    | 0.073                 | (0.263) | 0.366                                  | 0.391    | 0.025                 | (0.727) |
| 10     | 90      | 90      | 110           | 10            | 0.623                      | 0.514    | -0.109                | (0.110) | 0.432                                  | 0.452    | 0.020                 | (0.789) |
| 11     | 40      | 80      | 60            | 60            | 0.043                      | 0.061    | 0.019                 | (0.561) | 0.990                                  | 0.941    | -0.049                | (0.054) |
| 12     | 50      | 50      | 30            | 110           | 0.917                      | 0.806    | -0.110                | (0.022) | 0.116                                  | 0.168    | 0.052                 | (0.308) |
| 13     | 50      | 100     | 50            | 50            | 0.592                      | 0.632    | 0.040                 | (0.556) | 0.500                                  | 0.532    | 0.032                 | (0.658) |
| 14     | 25      | 125     | 0             | 0             | 0.930                      | 0.894    | -0.036                | (0.370) | 0.075                                  | 0.123    | 0.047                 | (0.267) |

*Note:*  $\pi_i$  denotes payoff to the dictator and  $\pi_j$  denotes payoff to the recipient. Each allocation involves a tradeoff between the two payoff vectors  $(\pi_i, \pi_j)$  and  $(\hat{\pi}_i, \hat{\pi}_j)$ . All subjects face choice 1 as their first choice. The order of choices 2-14 is randomized within subject.
